# Supplementary material
Source: publisher figshare collection journal article supplement (https://acs.figshare.com/ndownloader/files/4250392)
Supplement: Supplementary file 1 [file 4250392]

 
data_090325lt_0m 
 
_audit_creation_method            SHELXL-97 
_chemical_name_systematic 
; 
 ? 
; 
_chemical_name_common             ? 
_chemical_melting_point           ? 
_chemical_formula_moiety          ? 
_chemical_formula_sum 
 'C26 H32 Fe N4 Na O16 S2' 
_chemical_formula_weight          799.52 
 
loop_ 
 _atom_type_symbol 
 _atom_type_description 
 _atom_type_scat_dispersion_real 
 _atom_type_scat_dispersion_imag 
 _atom_type_scat_source 
 'C'  'C'   0.0033   0.0016 
 'International Tables Vol C Tables 4.2.6.8 and 6.1.1.4' 
 'H'  'H'   0.0000   0.0000 
 'International Tables Vol C Tables 4.2.6.8 and 6.1.1.4' 
 'N'  'N'   0.0061   0.0033 
 'International Tables Vol C Tables 4.2.6.8 and 6.1.1.4' 
 'O'  'O'   0.0106   0.0060 
 'International Tables Vol C Tables 4.2.6.8 and 6.1.1.4' 
 'Na'  'Na'   0.0362   0.0249 
 'International Tables Vol C Tables 4.2.6.8 and 6.1.1.4' 
 'Fe'  'Fe'   0.3463   0.8444 
 'International Tables Vol C Tables 4.2.6.8 and 6.1.1.4' 
 'S'  'S'   0.1246   0.1234 
 'International Tables Vol C Tables 4.2.6.8 and 6.1.1.4' 
 
_symmetry_cell_setting            Monoclinic
_symmetry_space_group_name_H-M    P2(1)/n 
 
loop_ 
 _symmetry_equiv_pos_as_xyz 
 'x, y, z' 
 '-x+1/2, y+1/2, -z+1/2' 
 '-x, -y, -z' 
 'x-1/2, -y-1/2, z-1/2' 
 
_cell_length_a                    13.1375(7) 
_cell_length_b                    13.0730(6) 
_cell_length_c                    19.7262(10) 
_cell_angle_alpha                 90.00 
_cell_angle_beta                  96.577(3) 
_cell_angle_gamma                 90.00 
_cell_volume                      3365.6(3) 
_cell_formula_units_Z             4 
_cell_measurement_temperature     100(2) 
_cell_measurement_reflns_used     2423 
_cell_measurement_theta_min       2.5
_cell_measurement_theta_max       25
 
_exptl_crystal_description        Lamellar
_exptl_crystal_colour             'dark red'
_exptl_crystal_size_max           0.18 
_exptl_crystal_size_mid           0.07
_exptl_crystal_size_min           0.02
_exptl_crystal_density_meas       'not measured' 
_exptl_crystal_density_diffrn     1.578 
_exptl_crystal_density_method     'not measured' 
_exptl_crystal_F_000              1652 
_exptl_absorpt_coefficient_mu     0.664 
_exptl_absorpt_correction_type    empirical 
_exptl_absorpt_correction_T_min   0.6421 
_exptl_absorpt_correction_T_max   0.7454
_exptl_absorpt_process_details    ? 
 
_exptl_special_details 
; 
 ? 
; 
 
_diffrn_ambient_temperature       100(2) 
_diffrn_radiation_wavelength      0.71073 
_diffrn_radiation_type            MoK\a 
_diffrn_radiation_source          'fine-focus sealed tube' 
_diffrn_radiation_monochromator   graphite 
_diffrn_measurement_device_type   'CCD area detector' 
_diffrn_measurement_method        'phi and omega scans'
_diffrn_detector_area_resol_mean  ? 
_diffrn_reflns_number             32741 
_diffrn_reflns_av_R_equivalents   0.0931 
_diffrn_reflns_av_sigmaI/netI     0.0938 
_diffrn_reflns_limit_h_min        -16 
_diffrn_reflns_limit_h_max        16 
_diffrn_reflns_limit_k_min        -16 
_diffrn_reflns_limit_k_max        14 
_diffrn_reflns_limit_l_min        -23 
_diffrn_reflns_limit_l_max        24 
_diffrn_reflns_theta_min          1.77 
_diffrn_reflns_theta_max          26.39 
_reflns_number_total              6888 
_reflns_number_gt                 4142 
_reflns_threshold_expression      >2sigma(I) 
 
_computing_data_collection        'Bruker APEX2' 
_computing_cell_refinement        'Bruker APEX2' 
_computing_data_reduction         'Bruker Saint' 
_computing_structure_solution     'Shelxtl-97 (Sheldrick, 2008)' 
_computing_structure_refinement   'Shelxtl-97 (Sheldrick, 2008)' 
_computing_molecular_graphics     'Bruker APEX2' 
_computing_publication_material   'Bruker APEX2' 
 
_refine_special_details 
; 
 Refinement of F^2^ against ALL reflections.  The weighted R-factor wR and 
 goodness of fit S are based on F^2^, conventional R-factors R are based 
 on F, with F set to zero for negative F^2^. The threshold expression of 
 F^2^ > 2sigma(F^2^) is used only for calculating R-factors(gt) etc. and is 
 not relevant to the choice of reflections for refinement.  R-factors based 
 on F^2^ are statistically about twice as large as those based on F, and R- 
 factors based on ALL data will be even larger. 
; 
 
_refine_ls_structure_factor_coef  Fsqd  
_refine_ls_matrix_type            full 
_refine_ls_weighting_scheme       calc  
_refine_ls_weighting_details 
 'calc w=1/[\s^2^(Fo^2^)+(0.1142P)^2^+2.1969P] where P=(Fo^2^+2Fc^2^)/3' 
_atom_sites_solution_primary      direct 
_atom_sites_solution_secondary    difmap 
_atom_sites_solution_hydrogens    geom 
_refine_ls_hydrogen_treatment     constr
_refine_ls_extinction_method      none 
_refine_ls_extinction_coef        ? 
_refine_ls_number_reflns          6888 
_refine_ls_number_parameters      454 
_refine_ls_number_restraints      2 
_refine_ls_R_factor_all           0.1251 
_refine_ls_R_factor_gt            0.0641 
_refine_ls_wR_factor_ref          0.2118 
_refine_ls_wR_factor_gt           0.1646 
_refine_ls_goodness_of_fit_ref    1.032 
_refine_ls_restrained_S_all       1.032 
_refine_ls_shift/su_max           0.001 
_refine_ls_shift/su_mean          0.000 
 
loop_ 
 _atom_site_label 
 _atom_site_type_symbol 
 _atom_site_fract_x 
 _atom_site_fract_y 
 _atom_site_fract_z 
 _atom_site_U_iso_or_equiv 
 _atom_site_adp_type 
 _atom_site_occupancy 
 _atom_site_symmetry_multiplicity 
 _atom_site_calc_flag 
 _atom_site_refinement_flags 
 _atom_site_disorder_assembly 
 _atom_site_disorder_group 
Fe1 Fe -0.08805(6) 0.49449(6) 0.35327(4) 0.0212(2) Uani 1 1 d . . . 
Na1 Na 0.06261(15) -0.01639(15) 0.34475(11) 0.0231(5) Uani 1 1 d . . . 
S1 S 0.05537(11) 0.55453(10) 0.41735(7) 0.0258(3) Uani 1 1 d . . . 
S2 S -0.05692(10) 0.44858(10) 0.24563(7) 0.0219(3) Uani 1 1 d . . . 
N1 N -0.1339(3) 0.3854(4) 0.3841(2) 0.0245(10) Uani 1 1 d . . . 
N2 N -0.1637(3) 0.5983(4) 0.3522(2) 0.0244(10) Uani 1 1 d . . . 
N3 N 0.3566(4) 0.2251(4) 0.5065(2) 0.0276(11) Uani 1 1 d . . . 
N4 N -0.0606(4) 0.8205(4) 0.0664(2) 0.0256(11) Uani 1 1 d . . . 
O1 O -0.1836(3) 0.3209(3) 0.4052(2) 0.0328(10) Uani 1 1 d . . . 
O2 O -0.2224(3) 0.6647(3) 0.3580(2) 0.0374(11) Uani 1 1 d . . . 
O3 O 0.4403(3) 0.2485(3) 0.5382(2) 0.0384(11) Uani 1 1 d . . . 
O4 O 0.3261(3) 0.1364(3) 0.5004(2) 0.0310(9) Uani 1 1 d . . . 
O5 O 0.2791(3) 0.1633(3) 0.36069(19) 0.0258(9) Uani 1 1 d . . . 
H5 H 0.2725 0.1052 0.3426 0.039 Uiso 1 1 calc R . . 
O6 O 0.1187(3) 0.1359(3) 0.38538(18) 0.0235(8) Uani 1 1 d . . . 
O7 O 0.0380(3) 0.8672(3) 0.2589(2) 0.0324(10) Uani 1 1 d . . . 
O8 O -0.1097(3) 0.9091(3) 0.1979(2) 0.0290(9) Uani 1 1 d . . . 
H8 H -0.0943 0.9690 0.2107 0.043 Uiso 1 1 calc R . . 
O9 O -0.0045(3) 0.8927(3) 0.0835(2) 0.0343(10) Uani 1 1 d . . . 
O10 O -0.1202(3) 0.8162(3) 0.0135(2) 0.0317(10) Uani 1 1 d . . . 
O11 O 0.2614(3) -0.0170(3) 0.29620(19) 0.0298(9) Uani 1 1 d . . . 
O12 O 0.2026(3) -0.1035(3) 0.4211(2) 0.0414(12) Uani 1 1 d . . . 
O13 O -0.0044(4) -0.1329(4) 0.4217(3) 0.0609(16) Uani 1 1 d . . . 
O14 O -0.1172(3) 0.0172(3) 0.3621(2) 0.0288(9) Uani 1 1 d . . . 
O15 O -0.0627(3) 0.1027(3) 0.24312(18) 0.0225(8) Uani 1 1 d . . . 
O16 O 0.1513(3) 0.1368(4) 0.2163(2) 0.0465(12) Uani 1 1 d D . . 
C1 C 0.1431(4) 0.4567(4) 0.4384(3) 0.0226(12) Uani 1 1 d . . . 
C2 C 0.2315(4) 0.4786(4) 0.4841(3) 0.0262(13) Uani 1 1 d . . . 
H2 H 0.2413 0.5460 0.5016 0.031 Uiso 1 1 calc R . . 
C3 C 0.3035(4) 0.4048(4) 0.5038(3) 0.0244(12) Uani 1 1 d . . . 
H3 H 0.3620 0.4209 0.5349 0.029 Uiso 1 1 calc R . . 
C4 C 0.2897(4) 0.3069(4) 0.4778(3) 0.0220(12) Uani 1 1 d . . . 
C5 C 0.2076(4) 0.2836(4) 0.4292(3) 0.0185(11) Uani 1 1 d . . . 
C6 C 0.1356(4) 0.3575(4) 0.4116(3) 0.0198(11) Uani 1 1 d . . . 
H6 H 0.0781 0.3408 0.3798 0.024 Uiso 1 1 calc R . . 
C7 C 0.1963(4) 0.1848(4) 0.3916(3) 0.0206(12) Uani 1 1 d . . . 
C8 C -0.0491(4) 0.5600(4) 0.1960(3) 0.0235(12) Uani 1 1 d . . . 
C9 C -0.0599(4) 0.5503(4) 0.1245(3) 0.0251(12) Uani 1 1 d . . . 
H9 H -0.0640 0.4839 0.1048 0.030 Uiso 1 1 calc R . . 
C10 C -0.0646(4) 0.6340(4) 0.0825(3) 0.0251(13) Uani 1 1 d . . . 
H10 H -0.0730 0.6259 0.0343 0.030 Uiso 1 1 calc R . . 
C11 C -0.0568(4) 0.7315(4) 0.1117(3) 0.0232(12) Uani 1 1 d . . . 
C12 C -0.0411(4) 0.7443(4) 0.1821(3) 0.0210(12) Uani 1 1 d . . . 
C13 C -0.0359(4) 0.6585(4) 0.2236(3) 0.0239(12) Uani 1 1 d . . . 
H13 H -0.0232 0.6666 0.2717 0.029 Uiso 1 1 calc R . . 
C14 C -0.0323(4) 0.8475(4) 0.2167(3) 0.0232(12) Uani 1 1 d . . . 
C15 C 0.3006(5) -0.1109(5) 0.3250(3) 0.0384(16) Uani 1 1 d . . . 
H15A H 0.3707 -0.1224 0.3130 0.046 Uiso 1 1 calc R . . 
H15B H 0.2568 -0.1684 0.3065 0.046 Uiso 1 1 calc R . . 
C16 C 0.3022(5) -0.1069(6) 0.4001(3) 0.0412(17) Uani 1 1 d . . . 
H16A H 0.3386 -0.1678 0.4204 0.049 Uiso 1 1 calc R . . 
H16B H 0.3409 -0.0455 0.4176 0.049 Uiso 1 1 calc R . . 
C17 C 0.1663(5) -0.1937(6) 0.4408(4) 0.054(2) Uani 1 1 d . . . 
H17A H 0.2179 -0.2267 0.4743 0.065 Uiso 1 1 calc R . . 
H17B H 0.1532 -0.2396 0.4008 0.065 Uiso 1 1 calc R . . 
C18 C 0.0681(4) -0.1775(5) 0.4725(3) 0.0346(15) Uani 1 1 d . . . 
H18A H 0.0421 -0.2436 0.4879 0.042 Uiso 1 1 calc R . . 
H18B H 0.0804 -0.1314 0.5124 0.042 Uiso 1 1 calc R . . 
C19 C -0.0986(5) -0.1207(5) 0.4401(4) 0.0437(18) Uani 1 1 d . . . 
H19A H -0.0933 -0.0846 0.4845 0.052 Uiso 1 1 calc R . . 
H19B H -0.1286 -0.1890 0.4467 0.052 Uiso 1 1 calc R . . 
C20 C -0.1681(5) -0.0633(5) 0.3905(4) 0.0424(17) Uani 1 1 d . . . 
H20A H -0.1971 -0.1100 0.3538 0.051 Uiso 1 1 calc R . . 
H20B H -0.2255 -0.0356 0.4134 0.051 Uiso 1 1 calc R . . 
C21 C -0.1838(4) 0.0848(4) 0.3231(3) 0.0228(12) Uani 1 1 d . . . 
H21A H -0.2263 0.1223 0.3532 0.027 Uiso 1 1 calc R . . 
H21B H -0.2299 0.0461 0.2891 0.027 Uiso 1 1 calc R . . 
C22 C -0.1207(4) 0.1586(4) 0.2876(3) 0.0232(12) Uani 1 1 d . . . 
H22A H -0.1658 0.2084 0.2611 0.028 Uiso 1 1 calc R . . 
H22B H -0.0739 0.1967 0.3216 0.028 Uiso 1 1 calc R . . 
C23 C -0.0224(5) 0.1669(5) 0.1934(3) 0.0339(15) Uani 1 1 d . . . 
H23A H -0.0016 0.2335 0.2145 0.041 Uiso 1 1 calc R . . 
H23B H -0.0765 0.1798 0.1551 0.041 Uiso 1 1 calc R . . 
C24 C 0.0664(4) 0.1190(5) 0.1669(3) 0.0254(12) Uani 1 1 d . . . 
H24A H 0.0549 0.0447 0.1602 0.030 Uiso 1 1 calc R . . 
H24B H 0.0782 0.1499 0.1227 0.030 Uiso 1 1 calc R . . 
C25 C 0.2437(5) 0.0935(6) 0.1981(3) 0.0466(18) Uani 1 1 d D . . 
H25A H 0.3022 0.1358 0.2180 0.056 Uiso 1 1 calc R . . 
H25B H 0.2424 0.0956 0.1479 0.056 Uiso 1 1 calc R . . 
C26 C 0.2606(5) -0.0161(5) 0.2223(3) 0.0371(16) Uani 1 1 d D . . 
H26A H 0.2050 -0.0605 0.2007 0.044 Uiso 1 1 calc R . . 
H26B H 0.3267 -0.0420 0.2096 0.044 Uiso 1 1 calc R . . 
 
loop_ 
 _atom_site_aniso_label 
 _atom_site_aniso_U_11 
 _atom_site_aniso_U_22 
 _atom_site_aniso_U_33 
 _atom_site_aniso_U_23 
 _atom_site_aniso_U_13 
 _atom_site_aniso_U_12 
Fe1 0.0261(4) 0.0183(4) 0.0210(4) 0.0022(3) 0.0101(3) 0.0014(3) 
Na1 0.0255(11) 0.0207(12) 0.0245(12) -0.0020(9) 0.0080(9) -0.0026(9) 
S1 0.0339(8) 0.0200(8) 0.0245(8) -0.0029(6) 0.0074(6) -0.0034(6) 
S2 0.0267(7) 0.0186(7) 0.0217(7) 0.0008(5) 0.0081(5) 0.0030(6) 
N1 0.027(3) 0.028(3) 0.020(2) 0.000(2) 0.008(2) 0.004(2) 
N2 0.028(3) 0.024(3) 0.023(3) 0.004(2) 0.008(2) 0.001(2) 
N3 0.024(3) 0.040(3) 0.019(3) -0.001(2) 0.007(2) -0.002(2) 
N4 0.029(3) 0.026(3) 0.024(3) -0.004(2) 0.011(2) 0.002(2) 
O1 0.039(2) 0.022(2) 0.040(3) 0.0038(19) 0.018(2) -0.0037(19) 
O2 0.042(3) 0.034(3) 0.038(3) 0.005(2) 0.012(2) 0.016(2) 
O3 0.024(2) 0.054(3) 0.036(2) -0.008(2) -0.0039(19) -0.001(2) 
O4 0.031(2) 0.034(3) 0.029(2) -0.0007(18) 0.0048(17) -0.0014(18) 
O5 0.025(2) 0.027(2) 0.027(2) -0.0126(17) 0.0108(16) -0.0045(17) 
O6 0.022(2) 0.024(2) 0.026(2) -0.0037(16) 0.0056(16) -0.0015(16) 
O7 0.036(2) 0.028(2) 0.032(2) -0.0094(18) -0.0030(19) 0.0062(18) 
O8 0.031(2) 0.028(2) 0.028(2) -0.0070(18) 0.0033(17) 0.0030(18) 
O9 0.047(3) 0.026(2) 0.031(2) -0.0005(18) 0.0110(19) -0.015(2) 
O10 0.035(2) 0.036(2) 0.022(2) 0.0011(18) 0.0001(18) 0.0016(19) 
O11 0.036(2) 0.031(2) 0.025(2) 0.0002(17) 0.0136(17) 0.0072(18) 
O12 0.029(2) 0.043(3) 0.056(3) 0.028(2) 0.019(2) 0.005(2) 
O13 0.037(3) 0.078(4) 0.071(4) 0.055(3) 0.019(2) 0.013(3) 
O14 0.0193(19) 0.033(2) 0.036(2) 0.0137(18) 0.0082(17) -0.0014(16) 
O15 0.029(2) 0.017(2) 0.025(2) 0.0022(16) 0.0140(16) 0.0000(16) 
O16 0.035(3) 0.071(3) 0.035(3) -0.007(2) 0.008(2) 0.014(2) 
C1 0.029(3) 0.026(3) 0.016(3) -0.002(2) 0.012(2) -0.005(2) 
C2 0.034(3) 0.027(3) 0.019(3) -0.010(2) 0.010(2) -0.013(3) 
C3 0.021(3) 0.035(3) 0.018(3) -0.011(2) 0.004(2) -0.007(2) 
C4 0.021(3) 0.030(3) 0.016(3) -0.004(2) 0.008(2) -0.003(2) 
C5 0.022(3) 0.019(3) 0.016(3) 0.000(2) 0.009(2) -0.003(2) 
C6 0.024(3) 0.020(3) 0.016(3) -0.004(2) 0.007(2) -0.008(2) 
C7 0.020(3) 0.025(3) 0.017(3) -0.003(2) 0.004(2) 0.001(2) 
C8 0.019(3) 0.027(3) 0.026(3) -0.002(2) 0.007(2) -0.001(2) 
C9 0.021(3) 0.025(3) 0.029(3) -0.005(3) 0.004(2) 0.002(2) 
C10 0.024(3) 0.033(3) 0.020(3) -0.007(2) 0.008(2) -0.001(2) 
C11 0.021(3) 0.026(3) 0.023(3) 0.005(2) 0.006(2) -0.001(2) 
C12 0.015(3) 0.021(3) 0.027(3) -0.006(2) 0.006(2) -0.001(2) 
C13 0.024(3) 0.026(3) 0.022(3) 0.001(2) 0.006(2) 0.002(2) 
C14 0.025(3) 0.022(3) 0.024(3) -0.001(2) 0.010(2) -0.002(2) 
C15 0.038(4) 0.028(4) 0.051(4) 0.006(3) 0.017(3) 0.006(3) 
C16 0.027(3) 0.051(4) 0.046(4) 0.023(3) 0.008(3) 0.002(3) 
C17 0.043(4) 0.058(5) 0.065(5) 0.026(4) 0.018(4) 0.014(4) 
C18 0.029(3) 0.030(3) 0.048(4) 0.022(3) 0.016(3) 0.009(3) 
C19 0.027(3) 0.049(4) 0.057(5) 0.029(4) 0.013(3) 0.000(3) 
C20 0.026(3) 0.043(4) 0.060(5) 0.023(3) 0.014(3) -0.007(3) 
C21 0.021(3) 0.024(3) 0.024(3) 0.002(2) 0.006(2) 0.004(2) 
C22 0.026(3) 0.019(3) 0.025(3) -0.002(2) 0.001(2) 0.005(2) 
C23 0.034(3) 0.027(3) 0.043(4) 0.016(3) 0.014(3) 0.002(3) 
C24 0.027(3) 0.033(3) 0.018(3) 0.004(2) 0.010(2) -0.003(2) 
C25 0.043(4) 0.070(5) 0.028(4) 0.009(3) 0.007(3) 0.018(4) 
C26 0.031(3) 0.054(4) 0.029(3) -0.019(3) 0.017(3) -0.003(3) 
 
_geom_special_details 
; 
 All esds (except the esd in the dihedral angle between two l.s. planes) 
 are estimated using the full covariance matrix.  The cell esds are taken 
 into account individually in the estimation of esds in distances, angles 
 and torsion angles; correlations between esds in cell parameters are only 
 used when they are defined by crystal symmetry.  An approximate (isotropic) 
 treatment of cell esds is used for estimating esds involving l.s. planes. 
; 
 
loop_ 
 _geom_bond_atom_site_label_1 
 _geom_bond_atom_site_label_2 
 _geom_bond_distance 
 _geom_bond_site_symmetry_2 
 _geom_bond_publ_flag 
Fe1 N2 1.681(5) . ? 
Fe1 N1 1.688(5) . ? 
Fe1 S1 2.2845(16) . ? 
Fe1 S2 2.2879(16) . ? 
Na1 O6 2.239(4) . ? 
Na1 O7 2.273(4) 1_545 ? 
Na1 O13 2.389(5) . ? 
Na1 O14 2.464(4) . ? 
Na1 O12 2.513(5) . ? 
Na1 O11 2.883(4) . ? 
Na1 O15 2.897(4) . ? 
Na1 O16 3.531(5) . ? 
S1 C1 1.740(6) . ? 
S2 C8 1.765(6) . ? 
N1 O1 1.173(6) . ? 
N2 O2 1.176(6) . ? 
N3 O4 1.228(6) . ? 
N3 O3 1.239(6) . ? 
N3 C4 1.457(7) . ? 
N4 O9 1.220(6) . ? 
N4 O10 1.233(6) . ? 
N4 C11 1.464(7) . ? 
O5 C7 1.336(6) . ? 
O5 H5 0.8400 . ? 
O6 C7 1.198(6) . ? 
O7 C14 1.198(6) . ? 
O7 Na1 2.273(4) 1_565 ? 
O8 C14 1.317(7) . ? 
O8 H8 0.8400 . ? 
O11 C15 1.424(7) . ? 
O11 C26 1.458(7) . ? 
O12 C17 1.346(8) . ? 
O12 C16 1.418(7) . ? 
O13 C19 1.339(7) . ? 
O13 C18 1.425(7) . ? 
O14 C20 1.399(7) . ? 
O14 C21 1.409(6) . ? 
O15 C22 1.428(6) . ? 
O15 C23 1.437(6) . ? 
O16 C24 1.414(7) . ? 
O16 C25 1.422(7) . ? 
C1 C6 1.399(7) . ? 
C1 C2 1.415(8) . ? 
C2 C3 1.376(8) . ? 
C2 H2 0.9500 . ? 
C3 C4 1.383(7) . ? 
C3 H3 0.9500 . ? 
C4 C5 1.393(7) . ? 
C5 C6 1.369(7) . ? 
C5 C7 1.489(7) . ? 
C6 H6 0.9500 . ? 
C8 C13 1.400(7) . ? 
C8 C9 1.408(8) . ? 
C9 C10 1.370(8) . ? 
C9 H9 0.9500 . ? 
C10 C11 1.397(8) . ? 
C10 H10 0.9500 . ? 
C11 C12 1.390(7) . ? 
C12 C13 1.386(8) . ? 
C12 C14 1.512(7) . ? 
C13 H13 0.9500 . ? 
C15 C16 1.480(9) . ? 
C15 H15A 0.9900 . ? 
C15 H15B 0.9900 . ? 
C16 H16A 0.9900 . ? 
C16 H16B 0.9900 . ? 
C17 C18 1.511(9) . ? 
C17 H17A 0.9900 . ? 
C17 H17B 0.9900 . ? 
C18 H18A 0.9900 . ? 
C18 H18B 0.9900 . ? 
C19 C20 1.466(9) . ? 
C19 H19A 0.9900 . ? 
C19 H19B 0.9900 . ? 
C20 H20A 0.9900 . ? 
C20 H20B 0.9900 . ? 
C21 C22 1.496(8) . ? 
C21 H21A 0.9900 . ? 
C21 H21B 0.9900 . ? 
C22 H22A 0.9900 . ? 
C22 H22B 0.9900 . ? 
C23 C24 1.471(8) . ? 
C23 H23A 0.9900 . ? 
C23 H23B 0.9900 . ? 
C24 H24A 0.9900 . ? 
C24 H24B 0.9900 . ? 
C25 C26 1.519(9) . ? 
C25 H25A 0.9900 . ? 
C25 H25B 0.9900 . ? 
C26 H26A 0.9900 . ? 
C26 H26B 0.9900 . ? 
 
loop_ 
 _geom_angle_atom_site_label_1 
 _geom_angle_atom_site_label_2 
 _geom_angle_atom_site_label_3 
 _geom_angle 
 _geom_angle_site_symmetry_1 
 _geom_angle_site_symmetry_3 
 _geom_angle_publ_flag 
N2 Fe1 N1 116.8(2) . . ? 
N2 Fe1 S1 100.27(16) . . ? 
N1 Fe1 S1 113.38(16) . . ? 
N2 Fe1 S2 111.65(16) . . ? 
N1 Fe1 S2 102.80(16) . . ? 
S1 Fe1 S2 112.33(6) . . ? 
O6 Na1 O7 151.05(17) . 1_545 ? 
O6 Na1 O13 118.0(2) . . ? 
O7 Na1 O13 90.9(2) 1_545 . ? 
O6 Na1 O14 94.22(15) . . ? 
O7 Na1 O14 99.55(16) 1_545 . ? 
O13 Na1 O14 66.21(15) . . ? 
O6 Na1 O12 90.01(16) . . ? 
O7 Na1 O12 100.08(16) 1_545 . ? 
O13 Na1 O12 68.15(15) . . ? 
O14 Na1 O12 130.17(15) . . ? 
O6 Na1 O11 81.24(13) . . ? 
O7 Na1 O11 78.89(14) 1_545 . ? 
O13 Na1 O11 128.55(16) . . ? 
O14 Na1 O11 164.94(14) . . ? 
O12 Na1 O11 64.47(13) . . ? 
O6 Na1 O15 84.70(13) . . ? 
O7 Na1 O15 79.81(13) 1_545 . ? 
O13 Na1 O15 124.11(15) . . ? 
O14 Na1 O15 61.49(12) . . ? 
O12 Na1 O15 167.69(14) . . ? 
O11 Na1 O15 103.66(12) . . ? 
O6 Na1 O16 68.30(13) . . ? 
O7 Na1 O16 82.84(14) 1_545 . ? 
O13 Na1 O16 173.61(18) . . ? 
O14 Na1 O16 113.50(13) . . ? 
O12 Na1 O16 114.09(13) . . ? 
O11 Na1 O16 51.48(11) . . ? 
O15 Na1 O16 53.61(10) . . ? 
C1 S1 Fe1 111.18(19) . . ? 
C8 S2 Fe1 109.01(19) . . ? 
O1 N1 Fe1 166.5(4) . . ? 
O2 N2 Fe1 171.5(4) . . ? 
O4 N3 O3 122.9(5) . . ? 
O4 N3 C4 118.6(5) . . ? 
O3 N3 C4 118.4(5) . . ? 
O9 N4 O10 125.0(5) . . ? 
O9 N4 C11 118.0(5) . . ? 
O10 N4 C11 117.1(5) . . ? 
C7 O5 H5 109.5 . . ? 
C7 O6 Na1 138.8(4) . . ? 
C14 O7 Na1 133.9(4) . 1_565 ? 
C14 O8 H8 109.5 . . ? 
C15 O11 C26 111.5(4) . . ? 
C15 O11 Na1 99.7(3) . . ? 
C26 O11 Na1 115.5(3) . . ? 
C17 O12 C16 115.2(5) . . ? 
C17 O12 Na1 108.1(4) . . ? 
C16 O12 Na1 118.4(3) . . ? 
C19 O13 C18 115.0(5) . . ? 
C19 O13 Na1 121.1(4) . . ? 
C18 O13 Na1 116.2(4) . . ? 
C20 O14 C21 113.3(4) . . ? 
C20 O14 Na1 115.6(3) . . ? 
C21 O14 Na1 125.6(3) . . ? 
C22 O15 C23 112.6(4) . . ? 
C22 O15 Na1 98.6(3) . . ? 
C23 O15 Na1 124.2(3) . . ? 
C24 O16 C25 112.9(5) . . ? 
C24 O16 Na1 95.9(3) . . ? 
C25 O16 Na1 108.5(4) . . ? 
C6 C1 C2 116.5(5) . . ? 
C6 C1 S1 125.1(4) . . ? 
C2 C1 S1 118.4(4) . . ? 
C3 C2 C1 121.7(5) . . ? 
C3 C2 H2 119.2 . . ? 
C1 C2 H2 119.2 . . ? 
C2 C3 C4 119.2(5) . . ? 
C2 C3 H3 120.4 . . ? 
C4 C3 H3 120.4 . . ? 
C3 C4 C5 121.1(5) . . ? 
C3 C4 N3 119.2(5) . . ? 
C5 C4 N3 119.5(5) . . ? 
C6 C5 C4 118.6(5) . . ? 
C6 C5 C7 117.4(5) . . ? 
C4 C5 C7 123.9(5) . . ? 
C5 C6 C1 122.8(5) . . ? 
C5 C6 H6 118.6 . . ? 
C1 C6 H6 118.6 . . ? 
O6 C7 O5 124.7(5) . . ? 
O6 C7 C5 123.2(5) . . ? 
O5 C7 C5 111.7(4) . . ? 
C13 C8 C9 117.8(5) . . ? 
C13 C8 S2 123.8(4) . . ? 
C9 C8 S2 118.4(4) . . ? 
C10 C9 C8 121.8(5) . . ? 
C10 C9 H9 119.1 . . ? 
C8 C9 H9 119.1 . . ? 
C9 C10 C11 118.9(5) . . ? 
C9 C10 H10 120.6 . . ? 
C11 C10 H10 120.6 . . ? 
C12 C11 C10 121.1(5) . . ? 
C12 C11 N4 120.3(5) . . ? 
C10 C11 N4 118.5(5) . . ? 
C13 C12 C11 119.0(5) . . ? 
C13 C12 C14 117.3(5) . . ? 
C11 C12 C14 123.7(5) . . ? 
C12 C13 C8 121.2(5) . . ? 
C12 C13 H13 119.4 . . ? 
C8 C13 H13 119.4 . . ? 
O7 C14 O8 125.1(5) . . ? 
O7 C14 C12 121.2(5) . . ? 
O8 C14 C12 113.7(5) . . ? 
O11 C15 C16 109.4(5) . . ? 
O11 C15 H15A 109.8 . . ? 
C16 C15 H15A 109.8 . . ? 
O11 C15 H15B 109.8 . . ? 
C16 C15 H15B 109.8 . . ? 
H15A C15 H15B 108.2 . . ? 
O12 C16 C15 112.6(5) . . ? 
O12 C16 H16A 109.1 . . ? 
C15 C16 H16A 109.1 . . ? 
O12 C16 H16B 109.1 . . ? 
C15 C16 H16B 109.1 . . ? 
H16A C16 H16B 107.8 . . ? 
O12 C17 C18 110.1(6) . . ? 
O12 C17 H17A 109.6 . . ? 
C18 C17 H17A 109.6 . . ? 
O12 C17 H17B 109.6 . . ? 
C18 C17 H17B 109.6 . . ? 
H17A C17 H17B 108.2 . . ? 
O13 C18 C17 107.5(5) . . ? 
O13 C18 H18A 110.2 . . ? 
C17 C18 H18A 110.2 . . ? 
O13 C18 H18B 110.2 . . ? 
C17 C18 H18B 110.2 . . ? 
H18A C18 H18B 108.5 . . ? 
O13 C19 C20 113.8(5) . . ? 
O13 C19 H19A 108.8 . . ? 
C20 C19 H19A 108.8 . . ? 
O13 C19 H19B 108.8 . . ? 
C20 C19 H19B 108.8 . . ? 
H19A C19 H19B 107.7 . . ? 
O14 C20 C19 111.3(5) . . ? 
O14 C20 H20A 109.4 . . ? 
C19 C20 H20A 109.4 . . ? 
O14 C20 H20B 109.4 . . ? 
C19 C20 H20B 109.4 . . ? 
H20A C20 H20B 108.0 . . ? 
O14 C21 C22 108.5(4) . . ? 
O14 C21 H21A 110.0 . . ? 
C22 C21 H21A 110.0 . . ? 
O14 C21 H21B 110.0 . . ? 
C22 C21 H21B 110.0 . . ? 
H21A C21 H21B 108.4 . . ? 
O15 C22 C21 108.7(4) . . ? 
O15 C22 H22A 109.9 . . ? 
C21 C22 H22A 109.9 . . ? 
O15 C22 H22B 109.9 . . ? 
C21 C22 H22B 109.9 . . ? 
H22A C22 H22B 108.3 . . ? 
O15 C23 C24 111.3(5) . . ? 
O15 C23 H23A 109.4 . . ? 
C24 C23 H23A 109.4 . . ? 
O15 C23 H23B 109.4 . . ? 
C24 C23 H23B 109.4 . . ? 
H23A C23 H23B 108.0 . . ? 
O16 C24 C23 106.3(5) . . ? 
O16 C24 H24A 110.5 . . ? 
C23 C24 H24A 110.5 . . ? 
O16 C24 H24B 110.5 . . ? 
C23 C24 H24B 110.5 . . ? 
H24A C24 H24B 108.7 . . ? 
O16 C25 C26 113.3(6) . . ? 
O16 C25 H25A 108.9 . . ? 
C26 C25 H25A 108.9 . . ? 
O16 C25 H25B 108.9 . . ? 
C26 C25 H25B 108.9 . . ? 
H25A C25 H25B 107.7 . . ? 
O11 C26 C25 107.7(5) . . ? 
O11 C26 H26A 110.2 . . ? 
C25 C26 H26A 110.2 . . ? 
O11 C26 H26B 110.2 . . ? 
C25 C26 H26B 110.2 . . ? 
H26A C26 H26B 108.5 . . ? 
 
_diffrn_measured_fraction_theta_max    0.999 
_diffrn_reflns_theta_full              26.39 
_diffrn_measured_fraction_theta_full   0.999 
_refine_diff_density_max    1.780 
_refine_diff_density_min   -0.743 
_refine_diff_density_rms    0.123 
